# Supplementary material for: A fast and efficient pre-doping approach to high energy density lithium-ion hybrid capacitors
Source: Royal Society of Chemistry journal article supplement (doi:10.1039/c4ta00678j), 2014-01-01
Supplement: c4ta00678j1.pdf [file c4ta00678j1.pdf]

## Supporting Information

### A Fast and Efficient Pre-doping Approach to High Energy Density Lithium-Ion Hybrid Capacitors

Minho Kim<sup>§ab</sup>, Fan Xu<sup>§c</sup>, Jin Hong Lee<sup>a</sup>, Cheolsoo Jung<sup>c</sup>, Soon Man Hong<sup>ab</sup>, Q. M. Zhang<sup>d\*</sup>,  
Chong Min Koo<sup>ab\*</sup>

<sup>a</sup>Center for Materials Architecturing, Institute for Multi-Disciplinary Convergence of Materials, Korea Institute of Science and Technology (KIST), Hwarangno 14-gil 5, Seongbuk-gu, Seoul, Republic of Korea 136-791

; *E-mail*: koo@kist.re.kr

<sup>b</sup>Nanomaterials Science and Engineering, University of Science and Technology, 217 Gajungro, 176 Gajung-dong, Yuseong-Gu, Daejeon, Korea 305-333

<sup>c</sup>Department of Chemical Engineering, University of Seoul, 163 Siripdaero, Dongdaemun-gu, Seoul, Republic of Korea 130-743

<sup>d</sup>Department of Electrical Engineering, Materials Research Institute, The Pennsylvania State University, University Park, USA PA 16802  
; *E-mail*: qxz1@psu.edu

#### Supporting Figure S1

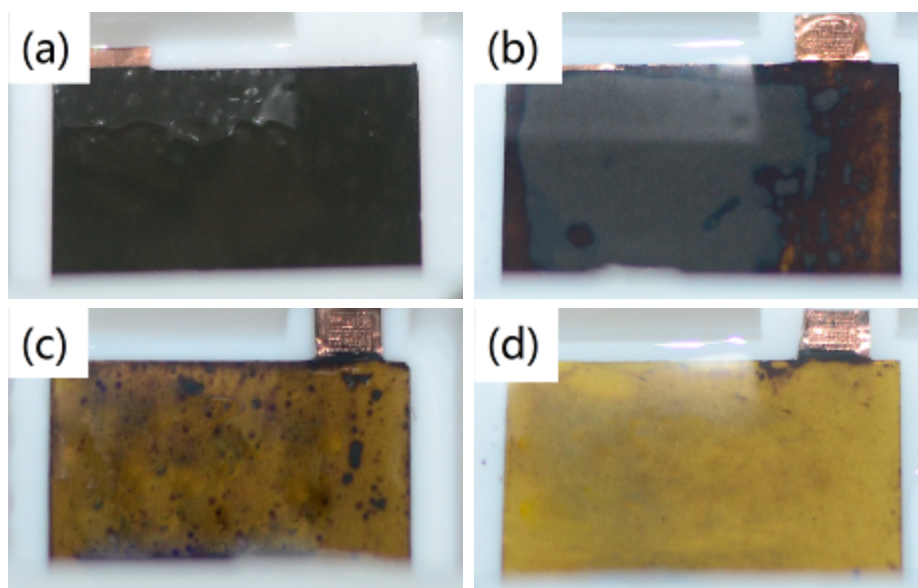

IS pre-doped graphite electrodes at various doping times: (a) 4, (b) 15, (c) 30, and (d) 60 min.

## Supporting Figure S2

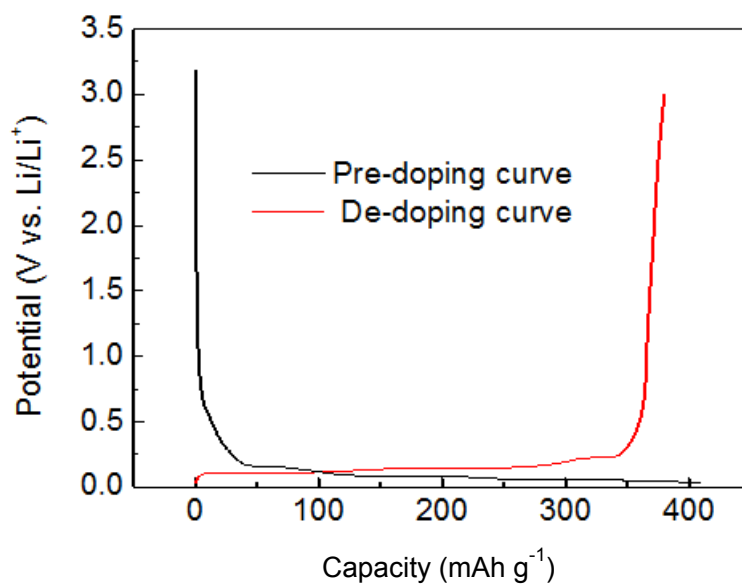

Pre-doping and de-doping curves of graphite electrodes via EC method at the current rate of 0.03 C.

### Supporting Figure S3

The AC/Li half-cell was charged from its OCV to 3.8 V and discharged to 2.2 V on 0.2 C condition. The capacitance of the AC electrode was 160 F g<sup>-1</sup>.

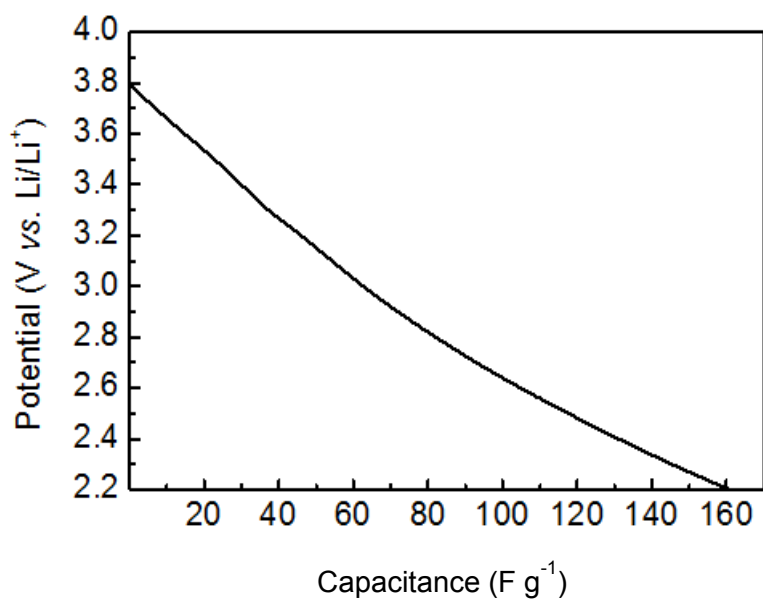

Discharge curves of AC/Li half-cell at 0.2C

Supporting Figure S4

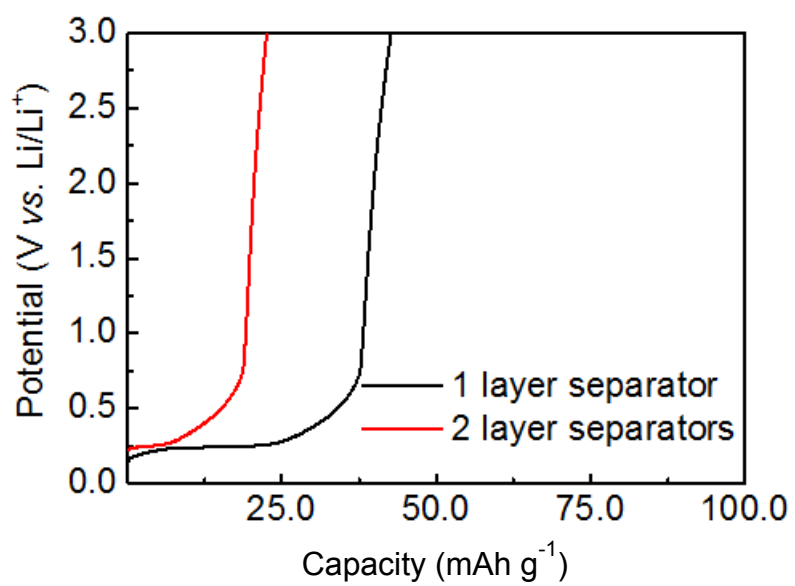

De-doping curves of the ESC pre-doped graphite with one layer or two layers of separator.
